# Supplementary material for: Deciphering swift reversal of multifaceted photodynamics of a novel pyrene appended unsymmetrical salicylaldehyde azine derivative in aqueous and protein environments
Source: Royal Society of Chemistry journal article supplement (doi:10.1039/d2nj04809d), 2023-01-01
Supplement: d2nj04809d1.pdf [file d2nj04809d1.pdf]

Supporting information for

**Deciphering Swift Reversal of Multifaceted Photodynamics of a Novel Pyrene Appended  
Unsymmetrical Salicylaldehyde Azine Derivative in Aqueous and Protein Environments**

Tapashree Mondal, Sourav Biswas, Manoj V. Mane and Sujit S. Panja\*

**TABLE OF CONTENTS**

| <b>Sl. No.</b> | <b>Content</b>                                                          | <b>Figure No.</b> |
|----------------|-------------------------------------------------------------------------|-------------------|
| <b>1.</b>      | $^1\text{H}$ NMR spectrum of <b>PHCS</b>                                | <b>S1</b>         |
| <b>2.</b>      | $^{13}\text{C}$ NMR spectrum of <b>PHCS</b>                             | <b>S2</b>         |
| <b>3.</b>      | FT-IR spectrum of <b>PHCS</b>                                           | <b>S3</b>         |
| <b>4.</b>      | ESI-MS spectrum of <b>PHCS</b>                                          | <b>S4</b>         |
| <b>5.</b>      | TD-DFT calculated theoretical absorption spectrum of <b>PHCS</b>        | <b>S5</b>         |
| <b>6.</b>      | Spectral overlap study between donor and acceptor                       | <b>S6</b>         |
| <b>7.</b>      | Effect of addition of trifluoroacetic acid on PL spectra of <b>PHCS</b> | <b>S7</b>         |
| <b>8.</b>      | Ratio of keto by enol isomer of <b>PHCS</b> with water variation in THF | <b>S8</b>         |

|            |                                                                                                               |                 |
|------------|---------------------------------------------------------------------------------------------------------------|-----------------|
| <b>9.</b>  | Selected optimized geometrical parameters for <b>PHCS</b> in the ground state calculated at B3LYP levels      | <b>Table S1</b> |
| <b>10.</b> | Electronic states involved in the absorption transitions of <b>PHCS</b>                                       | <b>Table S2</b> |
| <b>11.</b> | Fluorescence lifetime decay parameters of <b>PHCS</b> in THF                                                  | <b>Table S3</b> |
| <b>12.</b> | Fluorescence lifetime decay parameters of <b>PHCS</b> upon variation in fluorophore concentration in solution | <b>Table S4</b> |

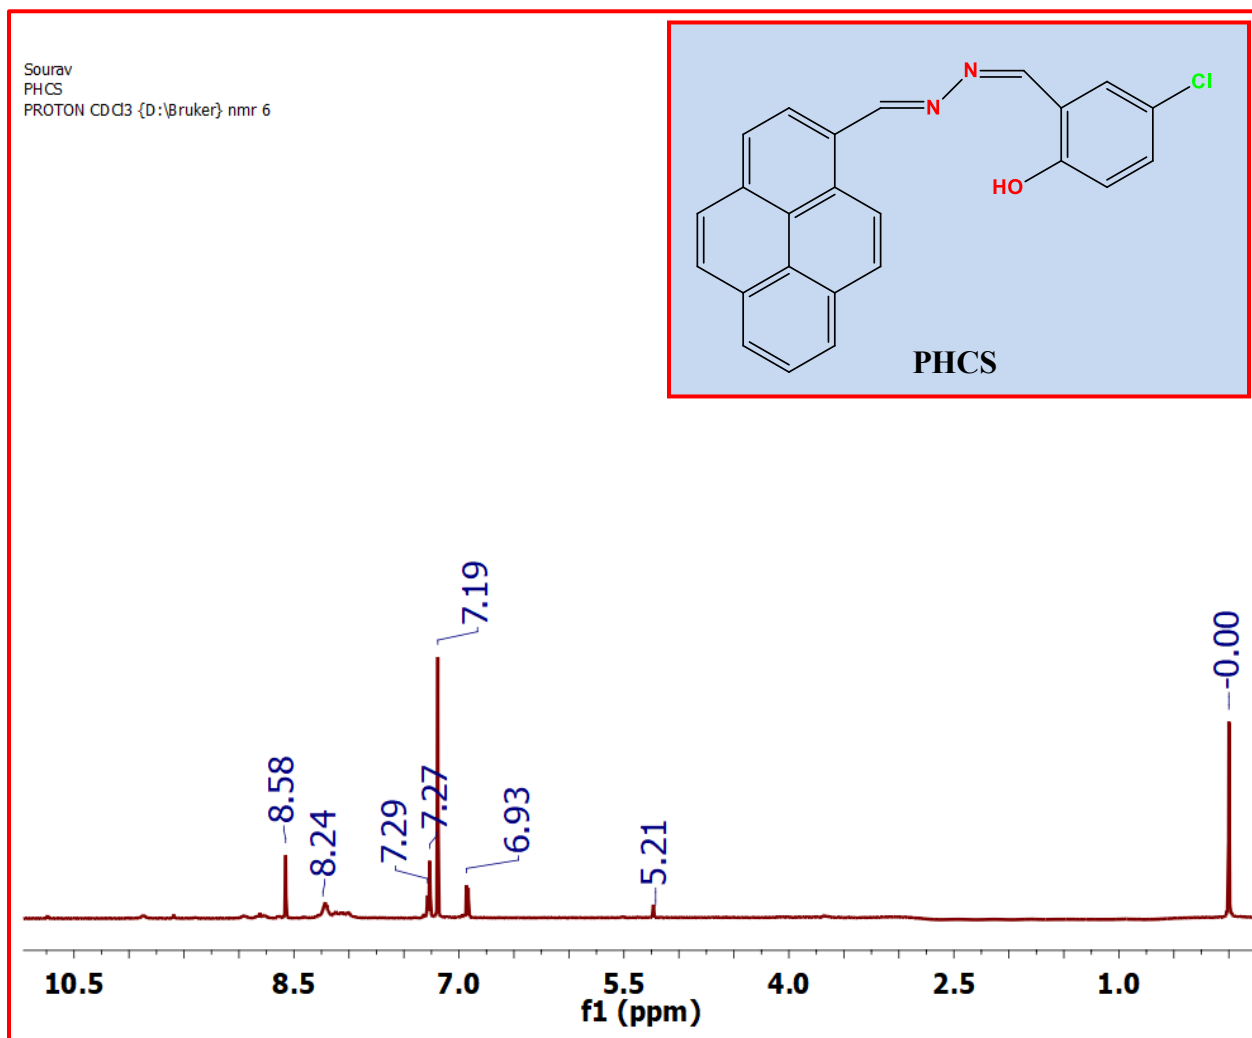

Fig. S1 <sup>1</sup>H NMR spectrum of PHCS.

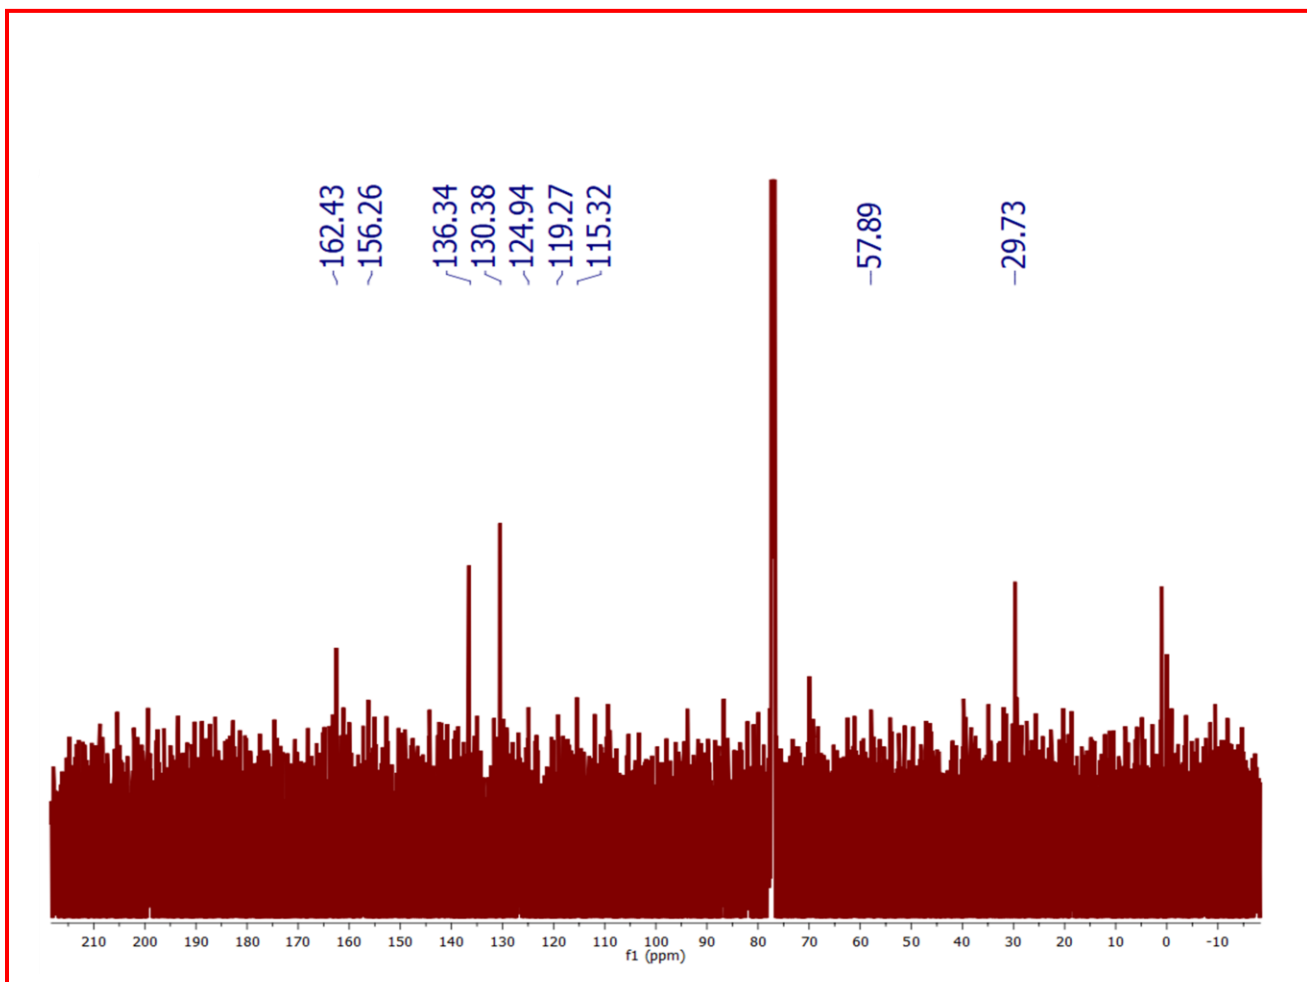

**Fig. S2**  $^{13}\text{C}$  NMR spectrum of PHCS.

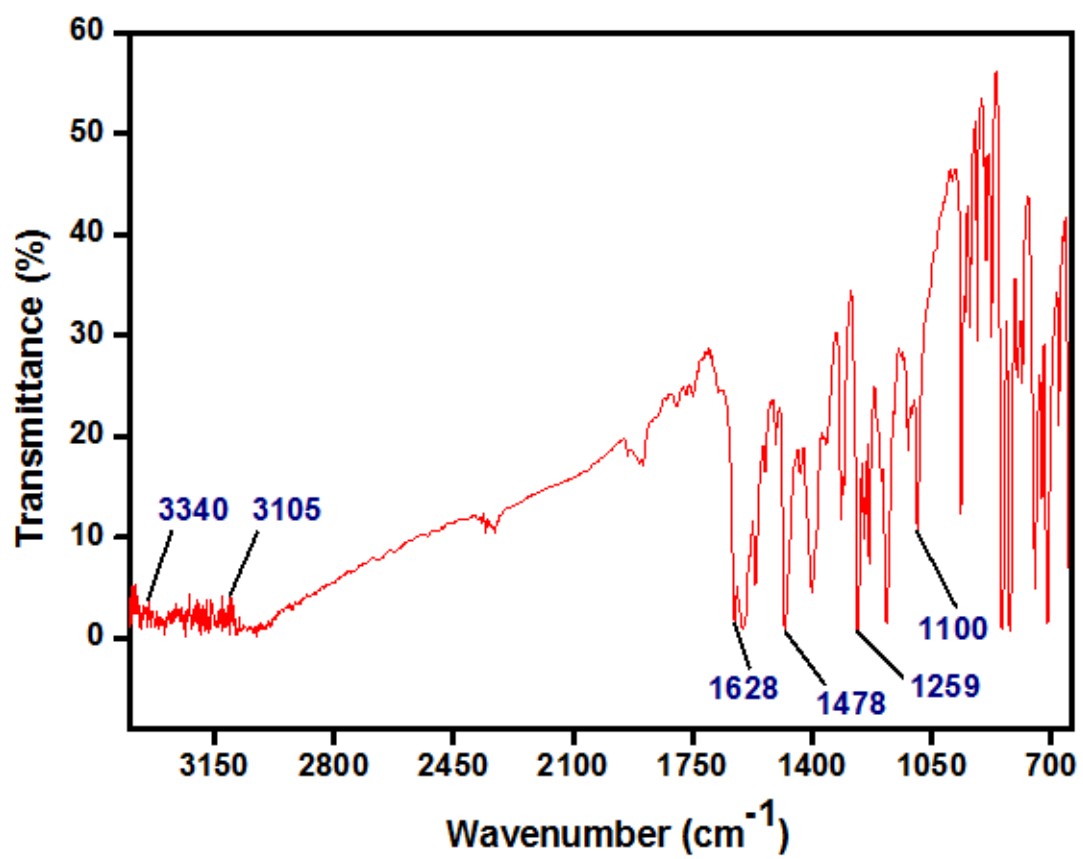

Fig. S3 FT-IR spectrum of PHCS.

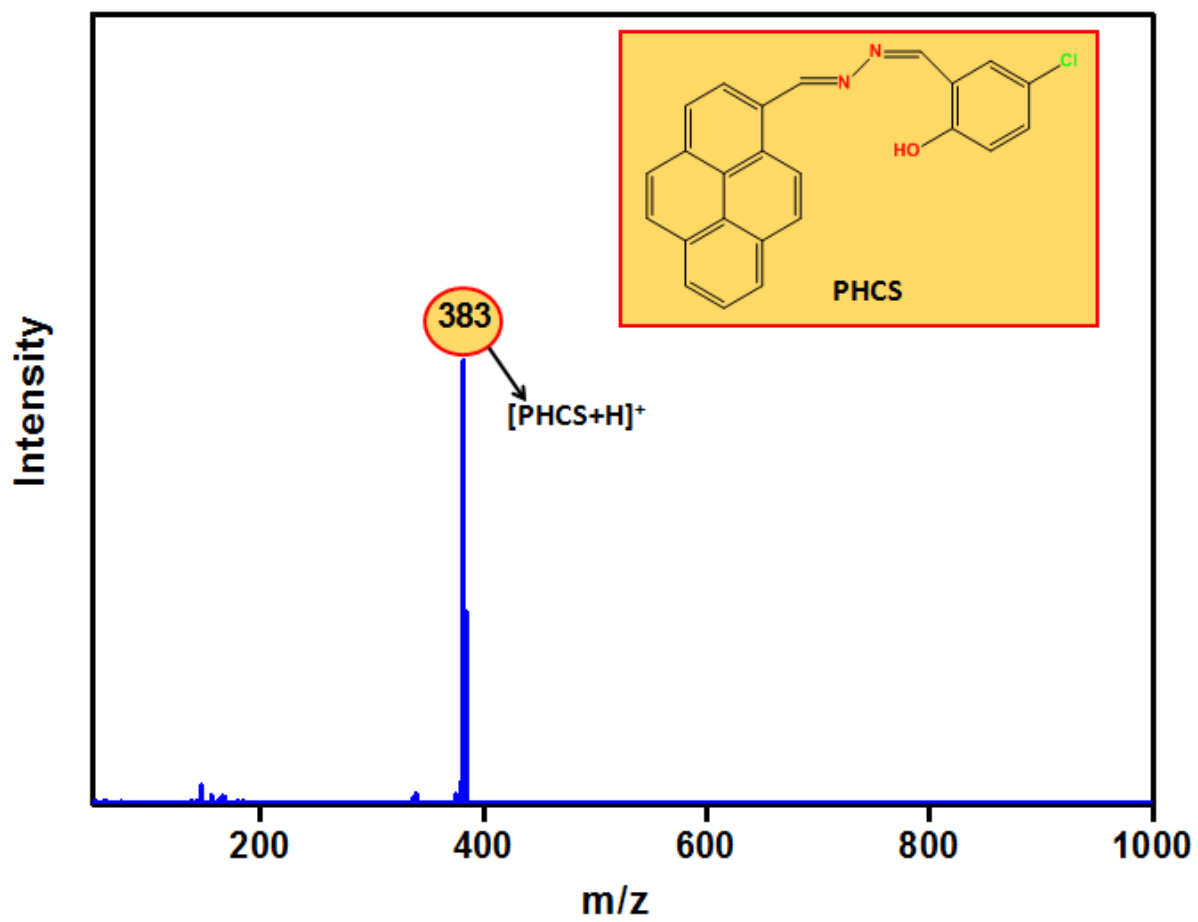

Fig. S4 ESI-MS spectrum of PHCS.

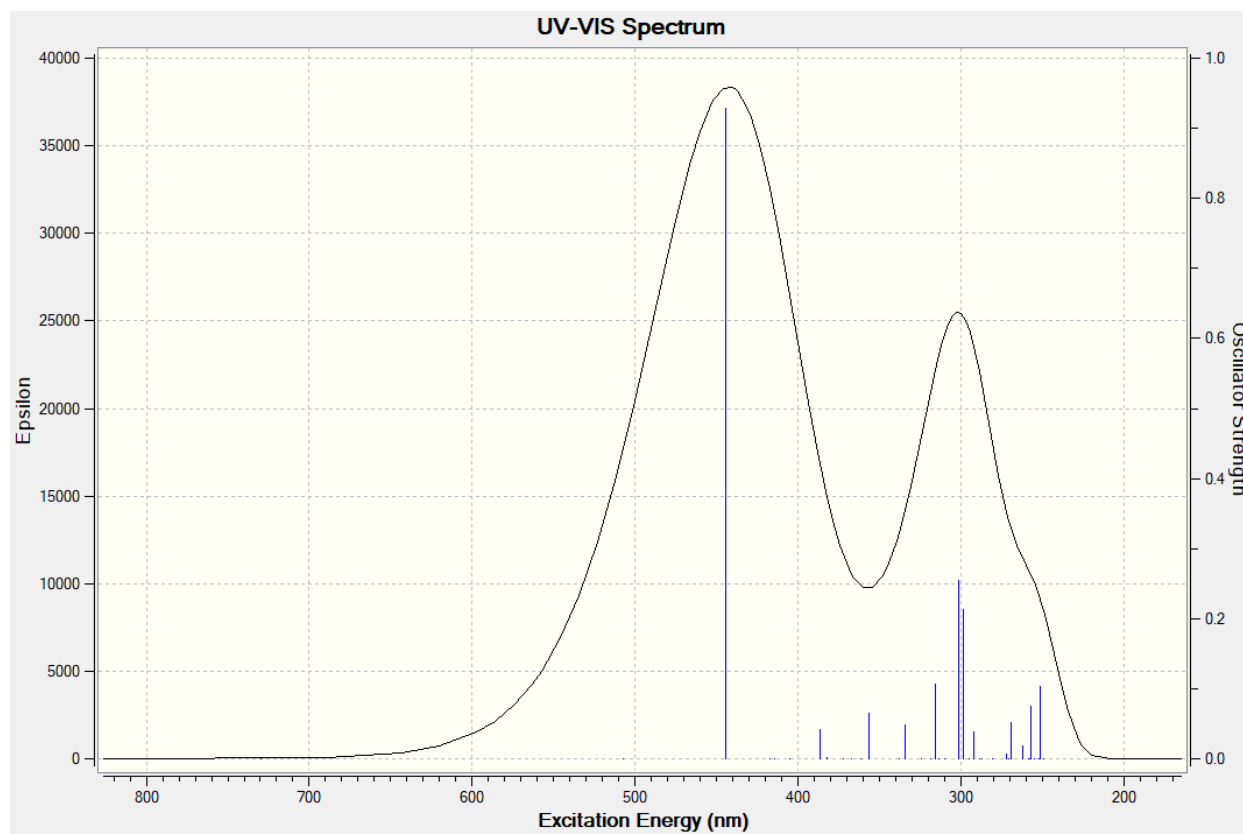

**Fig. S5** Simulated UV-visible absorption spectrum of **PHCS** obtained by TD-DFT method (in gas phase medium).

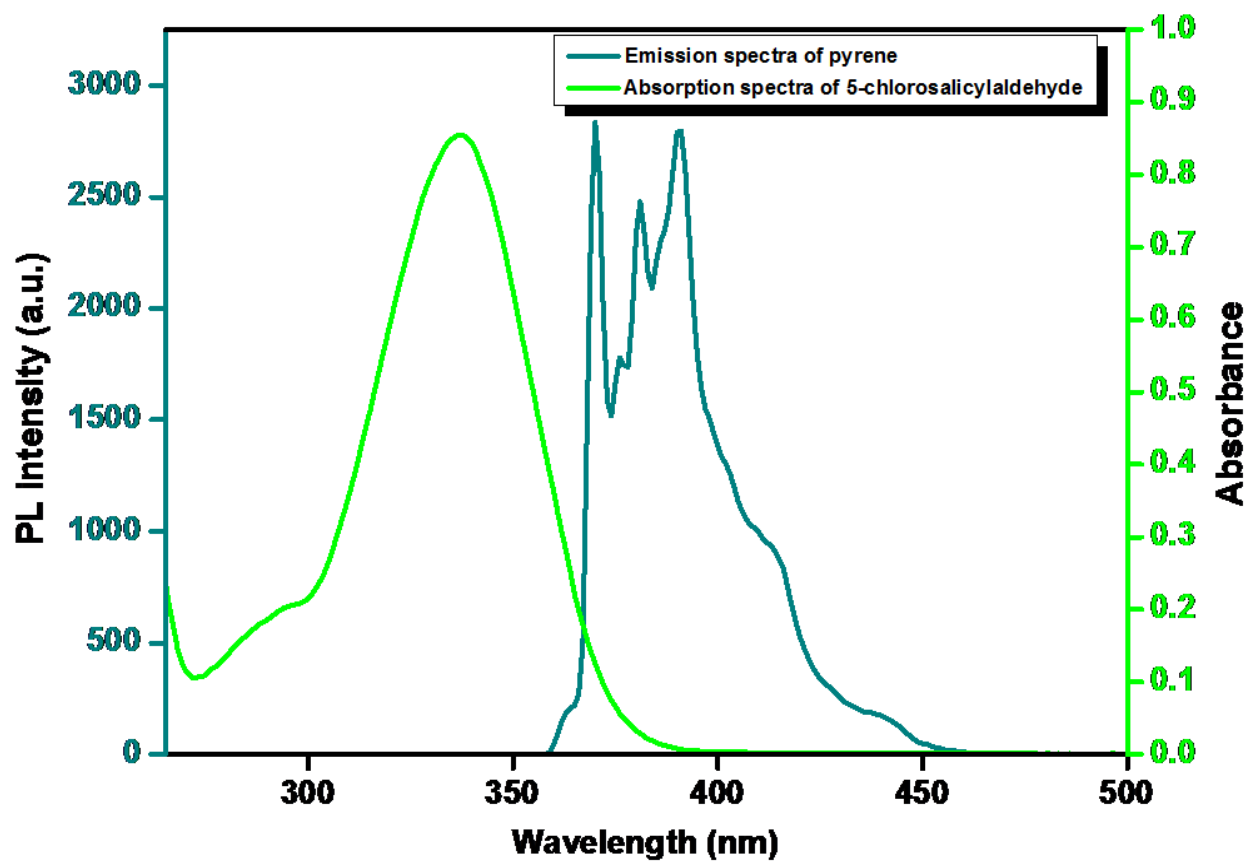

Fig. S6 Spectral overlap study between donor (pyrene) and acceptor (5-chlorosalicylaldehyde).



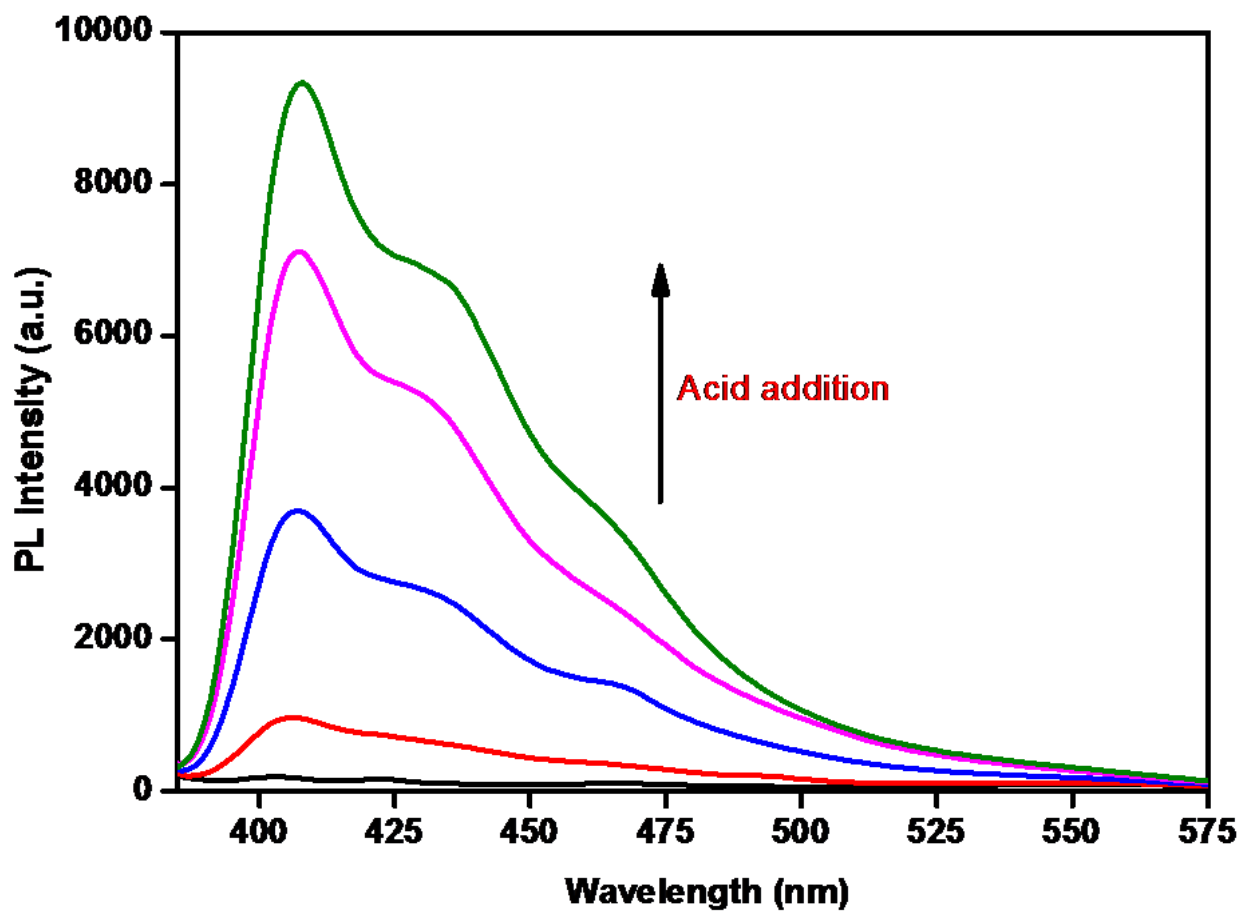

**Fig. S7** Effect of addition of trifluoroacetic acid (5  $\mu$ l) on fluorescence spectra of **PHCS** (15  $\mu$ M) in THF. Ex = 375 nm, slit = 5/5 nm.

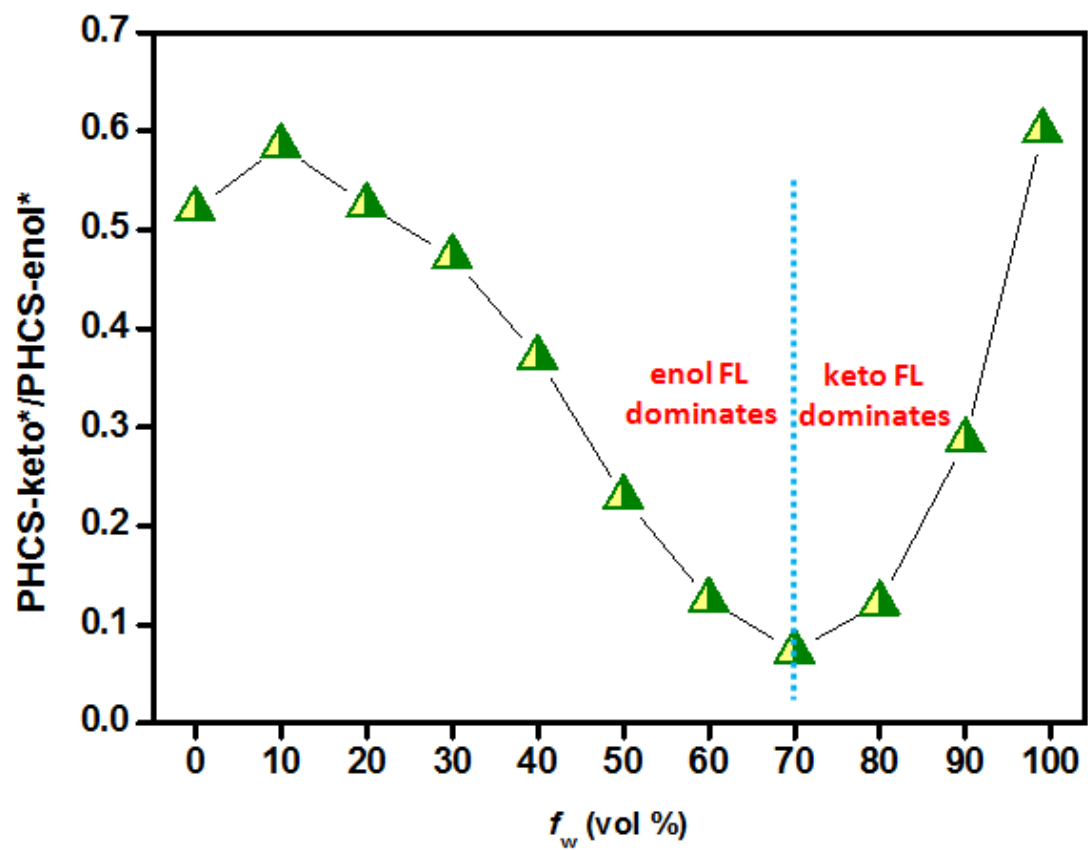

Fig. S8 Ratio of keto by enol isomer of **PHCS** with water variation in THF.

**Table S1.** Selected optimized geometrical parameters for **PHCS** in the ground state calculated at B3LYP levels.

| <b>Bond distance (Å)</b>                          |       |                                                   |       |
|---------------------------------------------------|-------|---------------------------------------------------|-------|
| C <sub>11</sub> -C <sub>26</sub>                  | 1.455 | N <sub>29</sub> -C <sub>30</sub>                  | 1.307 |
| C <sub>26</sub> -N <sub>28</sub>                  | 1.304 | C <sub>30</sub> -C <sub>32</sub>                  | 1.447 |
| N <sub>28</sub> -N <sub>29</sub>                  | 1.413 | C <sub>42</sub> -C <sub>43</sub>                  | 1.012 |
| <b>Bond Angle (°)</b>                             |       |                                                   |       |
| C <sub>11</sub> -C <sub>26</sub> -N <sub>28</sub> | 126.5 | N <sub>29</sub> -C <sub>30</sub> -C <sub>32</sub> | 121.3 |
| N <sub>28</sub> -N <sub>29</sub> -C <sub>30</sub> | 114.4 | N <sub>29</sub> -H <sub>43</sub> -O <sub>42</sub> | 144.5 |

**Table S2.** Electronic states involved in absorption, wavelength (nm), excitation energy (eV) and the corresponding oscillator strength ( $f$ ) for the transitions of **PHCS** (obtained from TD-DFT calculations).

| <b>Excitation energy (eV)</b> | <b>Wavelength (nm)</b> | <b>Oscillator strength (<math>f</math>)</b> | <b>MO contributions</b>   |
|-------------------------------|------------------------|---------------------------------------------|---------------------------|
| 4.115                         | 301.25                 | 0.2552                                      | HOMO-2 $\rightarrow$ LUMO |
| 2.969                         | 417.47                 | 0.9284                                      | HOMO $\rightarrow$ LUMO   |

**Table S3.** Fluorescence lifetime decay parameters of **PHCS** in THF.

| <b>Solvent</b> | <b><math>\tau_1</math> (ns)</b> | <b><math>\alpha_1</math> (%)</b> | <b><math>\tau_2</math> (ns)</b> | <b><math>\alpha_2</math> (%)</b> | <b><math>\tau_{av}</math> (ns)</b> | <b><math>\chi^2</math></b> | <b><math>k_{et}</math> (<math>10^9 \text{ s}^{-1}</math>)</b> |
|----------------|---------------------------------|----------------------------------|---------------------------------|----------------------------------|------------------------------------|----------------------------|---------------------------------------------------------------|
| THF            | 0.435                           | 98.69                            | 2.854                           | 1.31                             | 1.035                              | 1.09                       | 1.95                                                          |

**Table S4.** Fluorescence lifetime decay parameters of **PHCS** (0-40  $\mu\text{M}$ ) in THF solvent.

Excitation = 375 nm nanoLED source, emission = 450 nm, bandpass = 6 nm, peak preset = 2000.

| <b>Concentration<br/>of PHCS<br/>solution (<math>\mu\text{M}</math>)</b> | $\tau_1$<br>(ns) | $\tau_2$<br>(ns) | $\alpha_1$<br>(%) | $\alpha_2$<br>(%) | $\tau_{\text{av}}$<br>(ns) | $\chi^2$ |
|--------------------------------------------------------------------------|------------------|------------------|-------------------|-------------------|----------------------------|----------|
| 1                                                                        | 0.039            | 0.915            | 96.41             | 3.59              | 0.039                      | 1.14     |
| 5                                                                        | 0.069            | 1.327            | 91.31             | 8.69              | 0.075                      | 1.01     |
| 10                                                                       | 0.077            | 1.609            | 85.82             | 14.18             | 0.089                      | 1.1      |
| 15                                                                       | 0.435            | 2.854            | 98.69             | 1.31              | 1.035                      | 1.09     |
| 40                                                                       | 1.145            | 5.716            | 30.41             | 69.59             | 2.581                      | 1.16     |
